# Supplementary material for: Porous nitrogen-doped carbon tubes derived from reed catkins as a high-performance anode for lithium ion batteries
Source: Royal Society of Chemistry journal article supplement (doi:10.1039/c6ra21620j), 2016-01-01
Supplement: c6ra21620j1.pdf [file c6ra21620j1.pdf]

*Supporting Information*

**Porous nitrogen-doped carbon tubes derived from reed catkins as  
high-performance anode for lithium ion batteries**

Yongzhi Zhang, Yujue Wang, Yan Meng, Guangqun Tan, Yong Guo \* and Dan  
Xiao\*

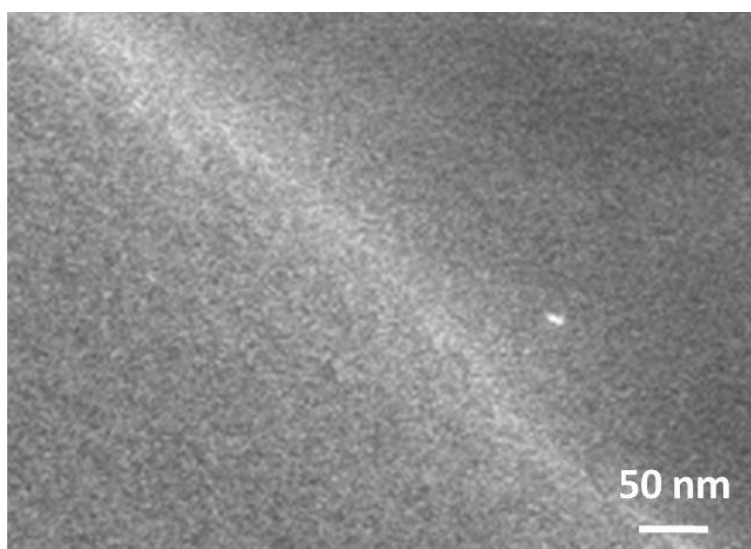

**Fig. S1** High-resolution SEM image of PNCTs.

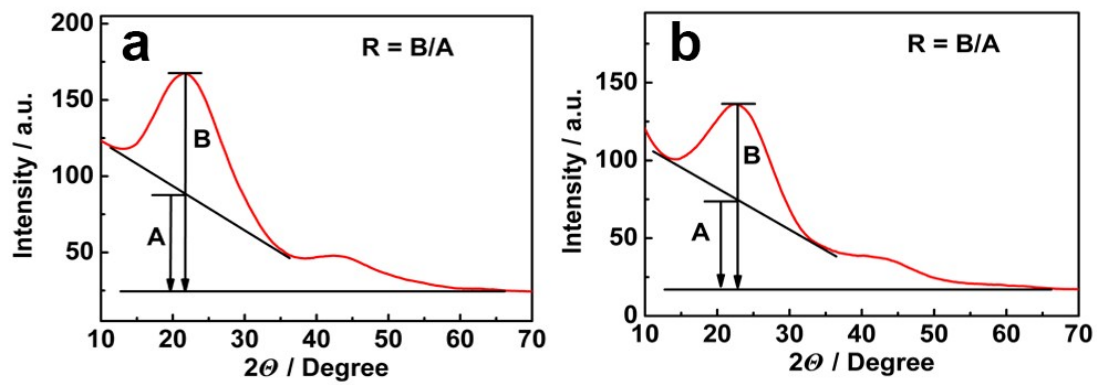

**Fig. S2** Scheme illustrating the R values calculation based on XRD patterns for NCTs (a) and PNCTs (b).

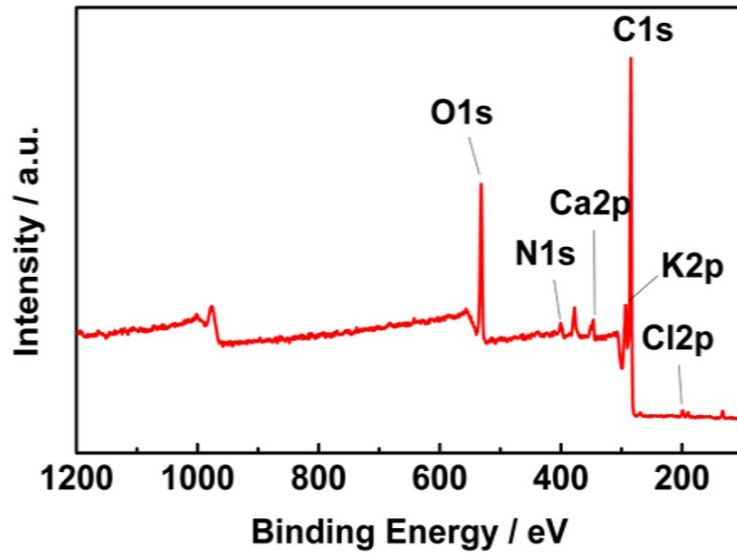

**Fig. S3** The total XPS spectrum.

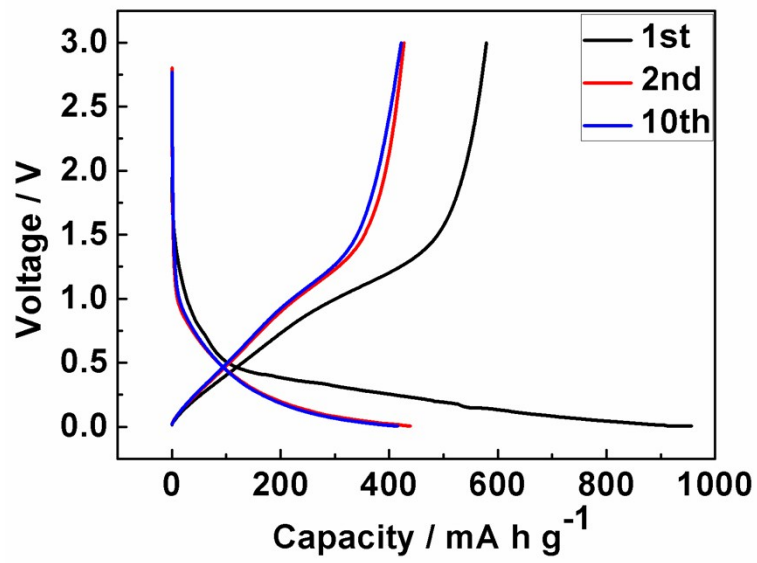

**Fig. S4** Charge-discharge curves of NCTs at 0.1 A g<sup>-1</sup>.

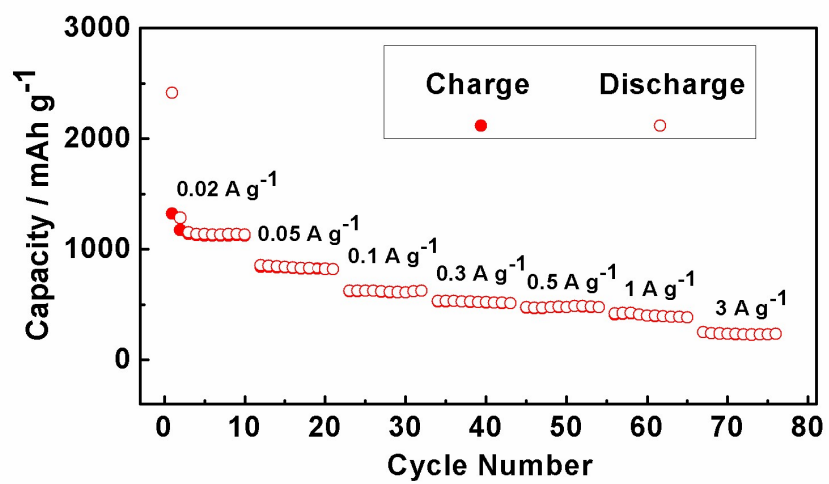

Fig. S5 Charge-discharge capacity versus cycle number of freshly obtained PNCTs at different rates.

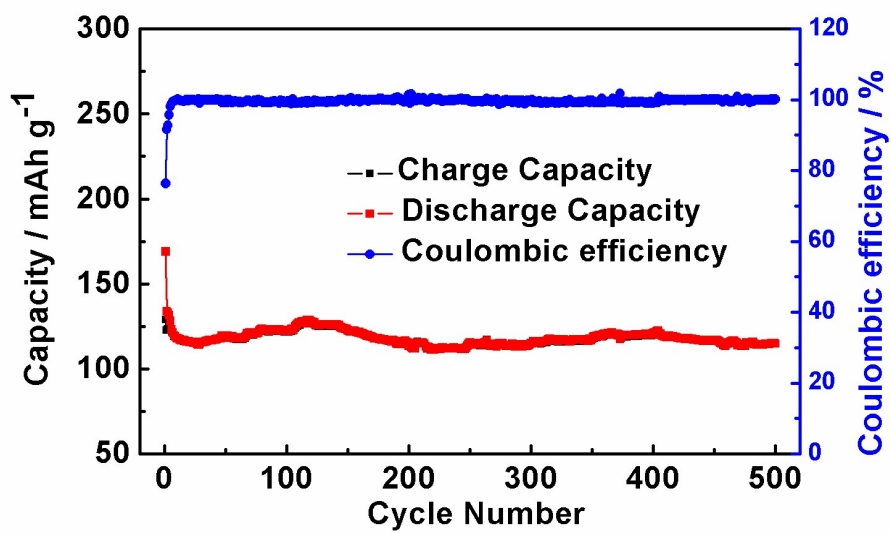

**Fig. S6** Cycling performance and corresponding Coulombic efficiency of NCTs at a current density of 1 A g<sup>-1</sup>.

**Table S1.** Reversible capacities and rate capabilities of carbons derived from biomass and other precursors as LIB anodes reported recently.

| Sample                                                          | Carbon precursor      | Reversible capacity/<br>mAh g <sup>-1</sup>                                                                        | Rate capability/<br>mAh g <sup>-1</sup> | Ref. |
|-----------------------------------------------------------------|-----------------------|--------------------------------------------------------------------------------------------------------------------|-----------------------------------------|------|
| Banana peel pseudographite (BPPG)                               | Banana peel           | 1184 of 2 <sup>nd</sup> cycle at 50 mA g <sup>-1</sup> and 790 of 11 <sup>th</sup> cycle at 100 mA g <sup>-1</sup> | 243 at 5 A g <sup>-1</sup>              | S1   |
| Ramie fiber carbon (RFC)                                        | ramie fibers          | 407 of 1 <sup>st</sup> cycle and 385 of 10 <sup>th</sup> cycle at 100 mA g <sup>-1</sup>                           | 204 at 0.5 A g <sup>-1</sup>            | S2   |
| Corn cob carbon (CC)                                            | corn cobs             | 415 of 1 <sup>st</sup> cycle and 359 of 10 <sup>th</sup> cycle at 100 mA g <sup>-1</sup>                           | 251 at 0.5 A g <sup>-1</sup>            | S2   |
| Peanut shells derived porous hard carbons (PSDHCs)              | Peanut shells         | stable capacity of 1230 at 50 mA g <sup>-1</sup>                                                                   | 310 at 5 A g <sup>-1</sup>              | S3   |
| N-doped garlic peel carbon (N-doped GPC)                        | Garlic peel           | 754 of 1 <sup>st</sup> cycle at 50 mA g <sup>-1</sup>                                                              | 215 at 4 A g <sup>-1</sup>              | S4   |
| Carbonaceous photonic crystals (CPCs)                           | Butterfly wings       | 590 of 10 <sup>th</sup> cycle at 50 mA g <sup>-1</sup>                                                             | 113 at 5 A g <sup>-1</sup>              | S5   |
| Hierarchically porous nitrogen-rich carbon (HPNC)               | Wheat straw           | 1470 of 1 <sup>st</sup> cycle and 1327 of 50 <sup>th</sup> at 37 mA g <sup>-1</sup>                                | 566 at 7.4 A g <sup>-1</sup>            | S6   |
| Ox horn derived carbon (OHC)                                    | Ox horn               | 1231 of 2 <sup>nd</sup> cycle and 1181 of 10 <sup>th</sup> cycle at 100 mA g <sup>-1</sup>                         | 304 at 5 A g <sup>-1</sup>              | S7   |
| Hierarchical porous nitrogen-doped carbon-nanosheets (HPNC-NSs) | Silk                  | 1913 of 1 <sup>st</sup> cycle and stable capacity of 1865 at 100 mA g <sup>-1</sup>                                | 523 at 5 A g <sup>-1</sup>              | S8   |
| Micro-sized porous carbon spheres (PCs)                         | Corn starch           | 519 of 1 <sup>st</sup> cycle and 507 of 100 <sup>th</sup> cycle at 100 mA g <sup>-1</sup>                          | 245 at 5 A g <sup>-1</sup>              | S9   |
| Porous carbon nanofibers/nanosheets hybrid (CNFS)               | Cornstalk             | stable capacity of 578 at 100 mA g <sup>-1</sup>                                                                   | 454 at 3 A g <sup>-1</sup>              | S10  |
| Interconnected highly graphitic carbon nanosheets (HGCNS)       | Wheat stalk           | 502 of 1 <sup>st</sup> cycle and 443.7 of 50 <sup>th</sup> cycle at 37.2 mA g <sup>-1</sup>                        | 161.4 at 3.72 A g <sup>-1</sup>         | S11  |
| Cotton derived porous carbon                                    | Cotton cellulose      | 1052.76 of 1 <sup>st</sup> cycle and 793 of 500 <sup>th</sup> cycle at 500 mA g <sup>-1</sup>                      | 355 at 4 A g <sup>-1</sup>              | S12  |
| Porous carbons derived from microalgae                          | Microalgae            | 445 of 1 <sup>st</sup> cycle and 433 of 100 <sup>th</sup> cycle at 37.5 mA g <sup>-1</sup>                         | 355 at 1 A g <sup>-1</sup>              | S13  |
| Porous carbon material (ACSB)                                   | Shells of broad beans | 845.2 of 1 <sup>st</sup> cycle at 186 mA g <sup>-1</sup>                                                           | 261.5 at 0.372 A g <sup>-1</sup>        | S14  |

## References

- S1 E. M. Lotfabad, J. Ding, K. Cui, A. Kohandehghan, W. P. Kalisvaart, M. Hazelton and D. Mitlin, *ACS Nano*, 2014, **8**, 7115-7129.
- S2 Q. Jiang, Z. Zhang, S. Yin, Z. Guo, S. Wang and C. Feng, *Appl. Surf. Sci.*, 2016, **379**, 73-82.
- S3 W. M. Lv, F. S. Wen, J. Y. Xiang, J. Zhao, L. Li, L. M. Wang, Z. Y. Liu and Y. J. Tian, *Electrochim. Acta*, 2015, **176**, 533-541.
- S4 V. Selvamani, R. Ravikumar, V. Suryanarayanan, D. Velayutham and S. Gopukumar, *Electrochim. Acta*, 2016, **190**, 337-345.
- S5 W. M. Lv, J. Zhao, F. S. Wen, J. Y. Xiang, L. Li, L. M. Wang, Z. Y. Liu and Y. J. Tian, *J. Mater. Chem. A*, 2015, **3**, 13786-13793.
- S6 L. Chen, Y. Z. Zhang, C. H. Lin, W. Yang, Y. Meng, Y. Guo, M. L. Li and D. Xiao, *J. Mater. Chem. A*, 2014, **2**, 9684-9690.
- S7 J. K. Ou, Y. Z. Zhang, L. Chen, Q. Zhao, Y. Meng, Y. Guo and D. Xiao, *J. Mater. Chem. A*, 2015, **3**, 6534-6541.
- S8 H. Hou, C. B. Cao, F. Idrees and X. L. Ma, *ACS Nano*, 2015, **9**, 2556-2564.
- S9 M. Chen, C. Yu, S. H. Liu, X. M. Fan, C. T. Zhao, X. Zhang and J. S. Qiu, *Nanoscale*, 2015, **7**, 1791-1795.
- S10 S. B. Wang, C. L. Xiao, Y. L. Xing, H. Z. Xu and S. C. Zhang, *J. Mater. Chem. A*, 2015, **3**, 6742-6746.
- S11 X. Y. Zhou, F. Chen, T. Bai, B. Long, Q. C. Liao, Y. P. Ren and J. Yang, *Green Chem.*, 2016, **18**, 2078-2088.
- S12 C. Y. Zhu and T. Akiyama, *Green Chem.*, 2016, **18**, 2106-2144.
- S13 H. H. Ru, N. B. Bai, K. X. Xiang, W. Zhou, H. Chen and X. S. Zhao, *Electrochim. Acta*, 2016, **194**, 10-16.
- S14 G. Xu, J. Han, B. Ding, P. Nie, J. Pan, H. Dou, H. Li and X. Zhang, *Green Chem.*, 2015, **17**, 1668-1674.



**Table S2.** Reversible capacities and rate capabilities of carbons derived from other precursors as LIB anodes reported recently.

| Sample                                                                | Carbon precursor                                                                                     | Reversible capacity/<br>mAh g <sup>-1</sup>                          | Rate capability/<br>mAh g <sup>-1</sup> | Ref. |
|-----------------------------------------------------------------------|------------------------------------------------------------------------------------------------------|----------------------------------------------------------------------|-----------------------------------------|------|
| Hierarchical porous carbon microspheres (HPCM)                        | Phenolic formaldehyde resin                                                                          | stable capacity of 585 mA h g <sup>-1</sup> at 50 mA g <sup>-1</sup> | 200 at 1 A g <sup>-1</sup>              | S15  |
| Amorphous nitrogen-doped carbon nanosheets                            | C <sub>10</sub> H <sub>12</sub> N <sub>2</sub> O <sub>8</sub> M-n Na <sub>2</sub> ·2H <sub>2</sub> O | 699.2 of 1 <sup>st</sup> cycle at 100 mA g <sup>-1</sup>             | 130.1 at 10 A g <sup>-1</sup>           | S16  |
| Carbon nanocages supported by ultrathin carbon nanosheets (CNCs@CNSs) | 1-hexadecylamine                                                                                     | 823.4 of 1 <sup>st</sup> cycle at 186 mA g <sup>-1</sup>             | 320 at 3.72 A g <sup>-1</sup>           | S17  |
| Nanoporous hard carbon microspheres (NHCSs)                           | Phenolic resin                                                                                       | 357 of 1 <sup>st</sup> cycle at 100 mA g <sup>-1</sup>               | ~80 at 3.72 A g <sup>-1</sup>           | S18  |
| Hollow graphite fibers (HGFs)                                         | Isotropic pitch                                                                                      | stable capacity of 385.5 at 50 mA g <sup>-1</sup>                    | 177.4 at 1 A g <sup>-1</sup>            | S19  |
| Boron and nitrogen co-doped porous carbon Nanotubes (BN-PCNTs)        | Polypyrrole (PPy)                                                                                    | 1261 of 1 <sup>st</sup> cycle at 200 mA g <sup>-1</sup>              | 282 at 2 A g <sup>-1</sup>              | S20  |
| Nitrogen-doped mesoporous carbon hollow spheres (N-MCHSs)             | Dopamine                                                                                             | 1100.6 of 1 <sup>st</sup> cycle at 500 mA g <sup>-1</sup>            | 214 at 4 A g <sup>-1</sup>              | S21  |
| Nitrogen-enriched porous carbon nanofiber networks (NPCNFs)           | Melamine and polyacrylonitrile                                                                       | 1323 of 1 <sup>st</sup> cycle at 50 mA g <sup>-1</sup>               | 473 at 1 A g <sup>-1</sup>              | S22  |
| Nitrogen-containing carbon (N-C) film                                 | Polypyrrole (PPy)                                                                                    | 957.8 of 1 <sup>st</sup> cycle at 500 mA g <sup>-1</sup>             | 325.9 at 20 A g <sup>-1</sup>           | S23  |
| Carbon nanospheres (CNSs)                                             | Natural gas                                                                                          | 552 of 1 <sup>st</sup> cycle at 50 mA g <sup>-1</sup>                | 106 at 5 A g <sup>-1</sup>              | S24  |
| PVP-derived carbon nanofibers (PVP-CNF)                               | Polyvinylpyrrolidone (PVP)                                                                           | 1025.7 of 1 <sup>st</sup> cycle at 100 mA g <sup>-1</sup>            | 1025.7 at 0.25 A g <sup>-1</sup>        | S25  |
| 3D free-standing carbon nanotubes (CNTs)                              | Ethylene                                                                                             | 397 of 1 <sup>st</sup> cycle at 37.2 mA g <sup>-1</sup>              | 248 at 0.372 A g <sup>-1</sup>          | S26  |

## References

S15 F. Wang, R. Song, H. Song, X. Chen, J. Zhou, Z. Ma, M. Li and Q. Lei, *Carbon*, 2015, **81**,

- 314-321.
- S16 W. Guo, X. Li, J. T. Xu, H. K. Liu, J. M. Ma and S. X. Dou, *Electrochim. Acta*, 2016, **188**, 414-420.
- S17 H. Ma, H. Jiang, Y. Jin, L. Dang, Q. Lu and F. Gao, *Carbon*, 2016, **105**, 586-592.
- S18 S. M. Jafari, M. Khosravi and M. Mollazadeh, *Electrochim. Acta*, 2016, **203**, 9-20.
- S19 L.Y. Wang, Z. J. Liu, Q. G. Guo, G. Z. Wang, J. H. Yang, P. Lie, X. L. Wang and L. Liu, *Electrochim. Acta*, 2016, **199**, 204-209.
- S20 L. Zhang, G. Xia, Z. Guo, X. Li, D. Sun and X. Yu, *Int. J. Hydrogen Energy*, 2016, **41**, 14252-14260.
- S21 K. F. Huo, W. L. An, J. J. Fu, B. Gao, L. Wang, X. Peng, G. J. Cheng and P. K. Chu, *J. Power Sources*, 2016, **324**, 233-238.
- S22 D. Nan, Z.-H. Huang, R. Lv, L. Yang, J.-G. Wang, W. Shen, Y. Lin, X. Yu, L. Ye, H. Sun and F. Kang, *J. Mater. Chem. A*, 2014, **2**, 19678-19684.
- S23 T. Yuan, Y. S. He, W. Zhang and Z. F. Ma, *Chem. Commun.*, 2016, **52**, 112-115.
- S24 C. Cui, X. Sun, X. Li, C. Li and Y. Niu, *RSC Adv.*, 2015, **5**, 55348-55352.
- S25 L. T. Dong, G. W. Wang, X. F. Li, D. B. Xiong, B. Yan, B. X. Chen, D. J. Li and Y. H. Cui, *RSC Adv.*, 2016, **6**, 4193-4199.
- S26 C. Kang, E. Cha, R. Baskaran and W. Choi, *Nanotechnology*, 2016, **27**, 105402-105408.
